# Supplementary material for: Evaluation of the Gonadotoxicity of Cancer Therapies to Improve Counseling of Patients About Fertility and Fertility Preservation Measures: Protocol for a Retrospective Systematic Data Analysis and a Prospective Cohort Study
Source: PubMed Central journal article supplement (PMC10993117; doi:10.2196/51145), 2024-03-20
Supplement: resprot_v13i1e51145_app2.pdf [file resprot_v13i1e51145_app2.pdf]

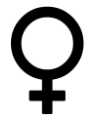

|                  |  |
|------------------|--|
| <b>Record ID</b> |  |
|------------------|--|

*Automatically generated by REDCap.*

## Study centre

|                                 |  |                                                                                                            |
|---------------------------------|--|------------------------------------------------------------------------------------------------------------|
| <b>Name of the study centre</b> |  | <i>See <b>annexed list</b> with the cities listed alphabetically for Austria, Germany and Switzerland.</i> |
|---------------------------------|--|------------------------------------------------------------------------------------------------------------|

|                                |                |  |
|--------------------------------|----------------|--|
| <b>if →<br/>NOT<br/>LISTED</b> | <b>Country</b> |  |
|                                | <b>City</b>    |  |
|                                | <b>Centre</b>  |  |

|                                               |  |                  |
|-----------------------------------------------|--|------------------|
| <b>Centre specific ID code of the patient</b> |  | <i>Optional.</i> |
|-----------------------------------------------|--|------------------|

|                                   |  |                                            |
|-----------------------------------|--|--------------------------------------------|
| <b>Date of first consultation</b> |  | <i>Min: 01-11-2023<br/>Max: 31-12-2039</i> |
|-----------------------------------|--|--------------------------------------------|

## Diagnosis

|                |                                                                                 |                                                       |
|----------------|---------------------------------------------------------------------------------|-------------------------------------------------------|
| <b>Disease</b> |                                                                                 | <i>See <b>annexed file</b> with the disease list.</i> |
|                | <i>Preliminary diagnosis, for which the fertility counselling is performed.</i> |                                                       |

|                                |  |
|--------------------------------|--|
| <b>if →<br/>NOT<br/>LISTED</b> |  |
|--------------------------------|--|

|                          |  |                                            |
|--------------------------|--|--------------------------------------------|
| <b>Date of diagnosis</b> |  | <i>Min: 01-01-2020<br/>Max: 31-12-2039</i> |
|--------------------------|--|--------------------------------------------|

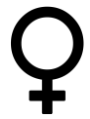

**AUSTRIA**

- Graz – Med Uni
- Innsbruck – Medical University
- Linz – JKU
- Salzburg – PMU
- Wien – MedUni
- Wien – St. Anna Kinderspital

**GERMANY**

- Aachen – RWTH
- Berlin – "an der Gedächtniskirche"
- Berlin – Charité
- Berlin – Fertility Centre
- Bielefeld – Fertility Centre
- Bonn – Venuskind am UKB
- Bremen – Mitte Clinic
- Dortmund – MVZ
- Dresden – Carl Gustav Carus
- Düsseldorf – UniKid
- Erlangen – University Hospital
- Frankfurt – Re-Pro Gyn
- Freiburg – University Hospital
- Gießen – UKGM (Andrology)
- Göttingen – UMG
- Greifswald – University Hospital
- Halle (Saale) – ZRA
- Hamburg – "amedes experts"
- Hannover – MHH
- Heidelberg – NCT
- Heidelberg – UKHD
- Hildesheim – Fertility Centre
- Karlsruhe – City Clinic
- Kassel – MVZ
- Kiel – UKSH Lübeck Manhagen
- Köln – MVZ PAN-Institute
- Köln – University Hospital
- Leipzig – University Hospital
- Lübeck – UKSH Schleswig-Holstein
- Magdeburg – OVGU
- Mainz – JGU
- Marburg – UKGM (Gynaecology)
- München – ART Bogenhausen
- München – LMU
- München – TUM
- Münster – UKM (Andrology)
- Münster – UKM (Fertility Centre)
- Oldenburg – Fertility Centre
- Regensburg – Profertilita
- Rostock – Fertility Centre
- Saarland – UKS
- Tübingen – University Hospital
- Ulm – UULM
- Wiesbaden – TFP
- Würzburg – University Hospital

**SWITZERLAND**

- Baden – Fertility Centre
- Basel – Fertility Centre
- Basel – University Hospital
- Bern – Fertility Centre (Lindenhofspital)
- Bern – Inselspital
- Biel – CARE
- Chur – Fontana
- Fribourg – HFR
- Genève – HUG
- Lausanne – CHUV
- Lausanne – CPMA
- Locarno – La Carità
- Luzern – LUKS
- Luzern – St. Anna
- Olten – fertisuisse
- St. Gallen – YUNA
- Winterthur – Admira
- Zürich – 360 Grad
- Zürich – GYN-A.R.T.
- Zürich – Gyné invitro
- Zürich – OVA IVF
- Zürich – USZ

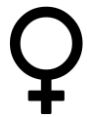

International Statistical Classification of Diseases and Related Health Problems 10th Revision (ICD-10)-WHO, Version for 2019-covid-expanded.

|          |                                                                                                                                                                                                                                                                                                                                                                                                                                                                               |          |                                                                                                                                                                                                                                                                                                                                                                                                                                                                                                                                                |
|----------|-------------------------------------------------------------------------------------------------------------------------------------------------------------------------------------------------------------------------------------------------------------------------------------------------------------------------------------------------------------------------------------------------------------------------------------------------------------------------------|----------|------------------------------------------------------------------------------------------------------------------------------------------------------------------------------------------------------------------------------------------------------------------------------------------------------------------------------------------------------------------------------------------------------------------------------------------------------------------------------------------------------------------------------------------------|
| <b>A</b> | <p>Agranulocytosis (D70)<br/>Anal carcinoma (C21)<br/>Anaemia - Aplastic (D60 – D61)<br/>Anaemia - Fanconi (D61.0)<br/>Angiosarcoma (C22.3)</p>                                                                                                                                                                                                                                                                                                                               | <b>N</b> | <p>Nasopharyngeal carcinoma (C11)<br/>Nebennierenkrebs → »Adrenocortical carcinoma«<br/>Nephritis / Glomerulonephritis (N05)<br/>Nephroblastoma → »Wilms' tumour«<br/>Non-Hodgkin lymphoma (C82 – C88)</p>                                                                                                                                                                                                                                                                                                                                     |
| <b>B</b> | <p>Blasenmole → »Trophoblastic disease«<br/><b>Brain cancer:</b><br/>▪ Astrocytoma (C71.9)<br/>▪ Ependymoma (C71.9)<br/>▪ Glioblastoma (C71.9)<br/>▪ Oligodendroglioma (C71.9)<br/>▪ Medulloblastoma (C71.6)<br/>▪ other (C71)<br/><b>Breast cancer:</b><br/>▪ benign BRCA positive (Z15.01)<br/>▪ hormone receptor positive (Z17.0)<br/>▪ hormone receptor negative (Z17.1)<br/>▪ hormone receptor status not known (Z17)<br/>▪ other (C50)<br/>Burkitt lymphoma (C83.7)</p> | <b>O</b> | <p>Osteosarcoma (C41.9)<br/><b>Ovary (C56):</b><br/>▪ borderline malignancy<br/>▪ teratoma benign<br/>▪ teratoma malignant<br/>▪ other</p>                                                                                                                                                                                                                                                                                                                                                                                                     |
| <b>C</b> | <p>Cervix uteri carcinoma (C53)<br/>Chondrosarcoma (C41.9)<br/>Colitis ulcerosa → »Ulcerative colitis«<br/>Colon carcinoma (C18)<br/>Crohn disease (K50)</p>                                                                                                                                                                                                                                                                                                                  | <b>P</b> | <p>Pancreatic cancer (C25)<br/>Placenta cancer (C58.9; D39.2) → »Trophoblastic disease«<br/>Pleomorphic undifferentiated sarcoma → »Undifferentiated pleomorphic sarcoma«<br/>Polyarteritis nodosa (M30)<br/>Polychondritis (M94.8)<br/>Polymyositis (M33)<br/>Premature ovarian insufficiency (E28.3)<br/>Prostate cancer (C61)</p>                                                                                                                                                                                                           |
| <b>D</b> | <p>Dermatomyositis (M33)</p>                                                                                                                                                                                                                                                                                                                                                                                                                                                  | <b>R</b> | <p>Rectal cancer (C20)<br/>Rectosigmoid junction cancer (C19)<br/>Renal cell carcinoma → »Kidney cancer«<br/>Rhabdomyosarcoma (C49.9)<br/>Rheumatoid arthritis (M05 – M06, M08)</p>                                                                                                                                                                                                                                                                                                                                                            |
| <b>E</b> | <p>Endometrial carcinoma (C54)<br/>Endometriosis (N80)<br/>Ewing sarcoma (C40-C41)</p>                                                                                                                                                                                                                                                                                                                                                                                        | <b>S</b> | <p>Schilddrüsenkrebs → »Thyroid cancer«<br/>Sharp syndrome → »Mixed connective tissue disease«<br/>Sickle cell disease (D57)<br/>Sigmakarzinom → »Colon carcinoma«<br/>Sjögren (Sicca) syndrome (M35)<br/>Stomach cancer (C16)<br/>Synovial sarcoma (C49.9)<br/>Systemic sclerosis (including: Scleroderma) (M34)</p>                                                                                                                                                                                                                          |
| <b>F</b> | <p>Fibrosarcoma (C49.9)<br/>Fragile X syndrome (Q99.2)</p>                                                                                                                                                                                                                                                                                                                                                                                                                    | <b>T</b> | <p>Takayasu arteritis (Aortic arch syndrome) (M31.4)<br/><b>Testicular cancer (C62):</b><br/>▪ seminoma<br/>▪ non seminomatous germ cell tumour - teratoma<br/>▪ non seminomatous germ cell tumour - embryonal carcinoma<br/>▪ non seminomatous germ cell tumour - yolk sac carcinoma<br/>▪ stromal tumour - Leydig cell tumour<br/>▪ stromal tumour - Sertoli cell tumour<br/>▪ other histological types<br/>Thalassemia (D56)<br/>Thyroid cancer (C73)<br/>Transgender (F64)<br/>Trophoblastic disease (O01.9)<br/>Turner syndrome (Q96)</p> |
| <b>G</b> | <p>Galactosemia (E74.2)<br/>Germ cell tumour - extragonadal (ICD-O-3 M906-909)</p>                                                                                                                                                                                                                                                                                                                                                                                            | <b>U</b> | <p>Ulcerative colitis (K51)<br/>Undifferentiated pleomorphic sarcoma (C49)</p>                                                                                                                                                                                                                                                                                                                                                                                                                                                                 |
| <b>H</b> | <p>Hodgkin lymphoma (C81)</p>                                                                                                                                                                                                                                                                                                                                                                                                                                                 | <b>V</b> | <p>Vasculitis limited to skin (L95)<br/>Vulva carcinoma (C51)</p>                                                                                                                                                                                                                                                                                                                                                                                                                                                                              |
| <b>I</b> | <p>Immune thrombocytopenia (D69)</p>                                                                                                                                                                                                                                                                                                                                                                                                                                          | <b>W</b> | <p>Wegener granulomatosis (M31.3)<br/>Wilms' tumour (Kidney cancer in children) (C64)</p>                                                                                                                                                                                                                                                                                                                                                                                                                                                      |
| <b>K</b> | <p>Keimzelltumor → »Germ cell tumour«<br/>Kidney cancer (C64)</p>                                                                                                                                                                                                                                                                                                                                                                                                             | <b>?</b> | <b>DISEASE NOT LISTED</b>                                                                                                                                                                                                                                                                                                                                                                                                                                                                                                                      |
| <b>L</b> | <p>Leiomyosarcoma NOS (ICD-O-3 M8890/3)<br/><b>Leukaemia:</b><br/>▪ Leukaemia lymphoid - acute lymphoblastic (C91.0)<br/>▪ Leukaemia lymphoid - chronic lymphocytic (C91)<br/>▪ Leukaemia myeloid - acute (C92)<br/>▪ Leukaemia myeloid - chronic (C92)<br/>▪ Leukaemia - other forms (C91 - C95)<br/>Liposarcoma (C49.9)<br/>Liver cancer (C22)<br/>Lung cancer (C34)<br/>Lupus erythematosus (L93)</p>                                                                      |          |                                                                                                                                                                                                                                                                                                                                                                                                                                                                                                                                                |
| <b>M</b> | <p>Malignant fibrous histiocytoma → »Undifferentiated pleomorphic sarcoma«<br/>Malignant nerve sheath tumour (C47.9)<br/>Melanoma (C43)<br/>Mesothelioma (C45)<br/>Mixed connective tissue disease (M35.1)<br/>Morbus Crohn → »Crohn disease«<br/>Myelodysplastic syndrome (D46)<br/>Multiple sclerosis (G35)<br/>Myositis (M60)</p>                                                                                                                                          |          |                                                                                                                                                                                                                                                                                                                                                                                                                                                                                                                                                |

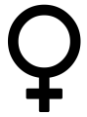

|                  |  |
|------------------|--|
| <b>Record ID</b> |  |
|------------------|--|

## Basic information

|                         |                                                                                                  |
|-------------------------|--------------------------------------------------------------------------------------------------|
| <b>Sex</b>              | <input type="checkbox"/> Male<br><input type="checkbox"/> Female                                 |
| <b>Year of birth</b>    | <input type="text"/><br><i>Integer, suggested range: 1973 - 2009</i>                             |
| <b>Age at inclusion</b> | <input type="text"/> years<br><i>Automatic calculation of rounded number of years in REDCap.</i> |
| <b>Height</b>           | <input type="text"/> cm<br><i>Integer, suggested range: 110 - 210</i>                            |
| <b>Weight</b>           | <input type="text"/> kg<br><i>Integer, suggested range: 30 - 250</i>                             |
| <b>BMI</b>              | <input type="text"/> kg/m <sup>2</sup><br><i>Automatic calculation of BMI in REDCap.</i>         |
| <b>Smoking status</b>   | <input type="checkbox"/> Yes<br><input type="checkbox"/> No                                      |
| <b>Partnership</b>      | <input type="checkbox"/> Yes<br><input type="checkbox"/> No                                      |



**Record ID**

**Fertility**

How many biological children does the patient have?

|                              |                    |              |
|------------------------------|--------------------|--------------|
| <input type="checkbox"/> 0   |                    |              |
| <input type="checkbox"/> 1   | ➔ Age of 1st child | <i>years</i> |
| <input type="checkbox"/> 2   | ➔ Age of 2nd child | <i>years</i> |
| <input type="checkbox"/> > 2 | ➔ Age of 3rd child | <i>years</i> |

*Integer, suggested range: 0 - 25*

**Infertility**

Yes

if YES ➔ What was the cause of infertility?

- Male
- Female
- Mixt
- Idiopathic
- Other

➔ if OTHER, please specify

if YES ➔ What type of treatment for infertility was received?

- Timed intercourse
- Ovarian stimulation and timed intercourse
- Intrauterine insemination
- IVF / ICSI
- Other

➔ if OTHER, please specify

No



Record ID

**GnRH analogues**

Ovarian function suppression  
Administration of GnRH analogues before gonadotoxic treatment?

Yes  
 No

**Oocytes, zygotes or embryos**

Yes

if YES ➔ Date of first oocytes, zygotes or embryos cryopreservation   
*Min: 01-11-2023  
Max: 31-12-2039*

if YES ➔ How many stimulation cycles have been performed?

0  
 1  
 2  
 > 2

if YES ➔ Total number of cryopreserved oocytes   
if YES ➔ Total number of cryopreserved zygotes   
if YES ➔ Total number of cryopreserved embryos   
*Integer, suggested range: 0 - 100*

if YES ➔ Complications during or just after the process of oocyte, zygote or embryo cryopreservation

None  
 Vaginal bleeding  
 Intra-abdominal bleeding  
 Injury of the intestines  
 Peritonitis  
 Requiring surgery  
 Leading to hospitalization or extension of hospitalization  
 Other  
*Several items can be chosen.*

if OTHER ➔ please specify

No

**Cryopreservation of oocytes, zygotes or embryos before gonadotoxic treatment?**



**Record ID**

**Ovarian tissue**

**Yes** Blood for AMH analysis to be taken before ovarian tissue removal.

**if YES → Date of ovarian tissue cryopreservation**  Min: 01-11-2023  
Max: 31-12-2039

**if YES → Amount of ovarian tissue removed**  < 1 ovary  
 1 ovary  
 > 1 ovary

**if YES → Complications during or just after the process of ovarian tissue removal**

- None
- Bleeding
- Infection
- Peritonitis
- Requiring surgery
- Leading to hospitalization or extension of hospitalization
- Other

Several items can be chosen.

**if OTHER → please specify**

**No**

**Cryopreservation of ovarian tissue before gonadotoxic treatment?**



Record ID

**Ovarian transposition**

**Ovarian transposition before gonadotoxic treatment?**

Yes

**if YES → Date of ovarian transposition**  Min: 01-11-2023  
Max: 31-12-2039

**if YES → Complications during or just after the process of ovarian transposition**

- None
- Bleeding
- Infection
- Peritonitis
- Requiring surgery
- Leading to hospitalization or extension of hospitalization
- Other

Several items can be chosen.

**if OTHER → please specify**

No

**Postponement**

**Was the cancer treatment postponed more than one week due to the fertility preservation measure?**

Yes  
 No  
 Unknown

Postponed treatments: chemotherapy, radiotherapy immunotherapy, operation.

**End Study Block Basic**

**Did you fill in all basic information and fertility preservation measures?**

Yes  
 No





|                  |  |
|------------------|--|
| <b>Record ID</b> |  |
|------------------|--|

## Eligibility

|                             |                                            |                              |                                                                                                                     |  |
|-----------------------------|--------------------------------------------|------------------------------|---------------------------------------------------------------------------------------------------------------------|--|
| <b>Informed Consent</b>     | <b>Signed</b>                              | <input type="checkbox"/> Yes | Date of signed 'Informed Consent' <table border="1" style="width: 100%; height: 20px;"> <tr><td></td></tr> </table> |  |
|                             |                                            |                              |                                                                                                                     |  |
| <input type="checkbox"/> No | <i>Min: 01-11-2023<br/>Max: 31-12-2039</i> |                              |                                                                                                                     |  |

|                                                                                                                                             |                                                                                |                                                                                 |  |
|---------------------------------------------------------------------------------------------------------------------------------------------|--------------------------------------------------------------------------------|---------------------------------------------------------------------------------|--|
| <b>Rough estimated date</b>                                                                                                                 | <b>Expected end of gonadotoxic treatment affecting the ovaries / testicles</b> | <table border="1" style="width: 100%; height: 20px;"><tr><td></td></tr></table> |  |
|                                                                                                                                             |                                                                                |                                                                                 |  |
| <i>Please add a rough estimate of the date in order to schedule the posttreatment consultation.<br/>Min: 01-11-2023<br/>Max: 31-12-2039</i> |                                                                                |                                                                                 |  |

|                           |          |                                                                                                                                                                                                            |                                                          |
|---------------------------|----------|------------------------------------------------------------------------------------------------------------------------------------------------------------------------------------------------------------|----------------------------------------------------------|
| <b>Inclusion Criteria</b> | <b>1</b> | Patients with cancer or with benign reasons undergoing chemotherapy and/or radiotherapy of the pelvis (females) and the testicles (males) and/or immune therapy                                            | <input type="checkbox"/> Yes <input type="checkbox"/> No |
|                           | <b>2</b> | Willing to participate                                                                                                                                                                                     | <input type="checkbox"/> Yes <input type="checkbox"/> No |
|                           | <b>3</b> | <ul style="list-style-type: none"> <li>▪ Austria: 14-50 years old (adolescents and adults)</li> <li>▪ Germany: 18-50 years old</li> <li>▪ Switzerland: 14-50 years old (adolescents and adults)</li> </ul> | <input type="checkbox"/> Yes <input type="checkbox"/> No |
|                           | <b>4</b> | Serum hormone analysis before gonadotoxic therapy (females) or serum hormone analysis and sperm analysis before gonadotoxic therapy (males)                                                                | <input type="checkbox"/> Yes <input type="checkbox"/> No |

|                           |          |                  |                                                          |
|---------------------------|----------|------------------|----------------------------------------------------------|
| <b>Exclusion Criteria</b> | <b>1</b> | Missing consent  | <input type="checkbox"/> Yes <input type="checkbox"/> No |
|                           | <b>2</b> | Language barrier | <input type="checkbox"/> Yes <input type="checkbox"/> No |

|                                  |                                                                                                                                                                                                          |
|----------------------------------|----------------------------------------------------------------------------------------------------------------------------------------------------------------------------------------------------------|
| <b>Eligibility Determination</b> | <input type="checkbox"/> Patient is <b>ELIGIBLE</b><br><input type="checkbox"/> Patient does <b>NOT</b> meet eligibility criteria<br><input type="checkbox"/> Eligibility criteria are <b>INCOMPLETE</b> |
|----------------------------------|----------------------------------------------------------------------------------------------------------------------------------------------------------------------------------------------------------|

*Automatically generated by REDCap.*



|                  |  |
|------------------|--|
| <b>Record ID</b> |  |
|------------------|--|

**Blood parameters**

|                                    |                                                                                                           |                                                                                                                                                  |
|------------------------------------|-----------------------------------------------------------------------------------------------------------|--------------------------------------------------------------------------------------------------------------------------------------------------|
| <b>Date of blood test</b>          | <input type="text"/>                                                                                      | Min: 01-11-2023<br>Max: 31-12-2039                                                                                                               |
| <b>Serum AMH concentration</b>     | <input type="text"/>                                                                                      | Number (one decimal place), suggested range: 0.0 - 150.0<br><i>In case of ovarian tissue removal, the blood sample must be taken beforehand.</i> |
| <b>Unit of the serum AMH value</b> | <input type="checkbox"/> pmol/L<br><input type="checkbox"/> ng/mL<br><input type="checkbox"/> microgram/L |                                                                                                                                                  |

**Menstrual cycle parameters**

|                                                         |                                                                                                                                                                                                                                                                                                                                                                                                                                                                             |
|---------------------------------------------------------|-----------------------------------------------------------------------------------------------------------------------------------------------------------------------------------------------------------------------------------------------------------------------------------------------------------------------------------------------------------------------------------------------------------------------------------------------------------------------------|
| <b>How is the menstrual cycle?</b>                      | <input type="checkbox"/> Regular (21-35 days)<br><input type="checkbox"/> Regular (due to hormones, such as oral contraceptives and hormone replacement therapy)<br><input type="checkbox"/> Irregular (oligomenorrhea, polymenorrhea, etc.)<br><input type="checkbox"/> Amenorrhea = no or rare bleeding (due to premature ovarian insufficiency)<br><input type="checkbox"/> Amenorrhea (due to other reasons, such as pregnancy, breastfeeding, hormone treatment, etc.) |
|                                                         | <small>In the last 3-6 months.</small>                                                                                                                                                                                                                                                                                                                                                                                                                                      |
| <b>Day of menstrual cycle when blood test was taken</b> | <input type="checkbox"/> Day 1-5<br><input type="checkbox"/> After day 5<br><input type="checkbox"/> Cannot be specified (amenorrhoea etc.)<br><input type="checkbox"/> Unknown                                                                                                                                                                                                                                                                                             |
